# Supplementary material for: The Effect of High Pressure Processing on Polyphenol Oxidase Activity, Phytochemicals and Proximate Composition of Irish Potato Cultivars
Source: MDPI journal article supplement (doi:10.3390/foods8100517), 2019-10-19
Supplement: s1 [file s1]

# The effect of high pressure processing on polyphenol oxidase activity, phytochemicals and proximate composition of Irish potato cultivars

Konstantina Tsikrika<sup>1</sup>, Nora O'Brien<sup>2</sup>, and Dilip K. Rai<sup>1\*</sup>

<sup>1</sup>Department of Food Biosciences, Teagasc Food Research Centre, Ashtown, Dublin, D15 KN3K, Ireland; Konstantina.tsikrika@teagasc.ie

<sup>2</sup>School of Food & Nutritional Sciences, University College Cork, College Road, Cork T12 K8AF, Ireland; nob@ucc.ie

\* Correspondence: dilip.raai@teagasc.ie ; Tel.: +353-1-8059500 (D.K.R)

Received: date; Accepted: date; Published: date

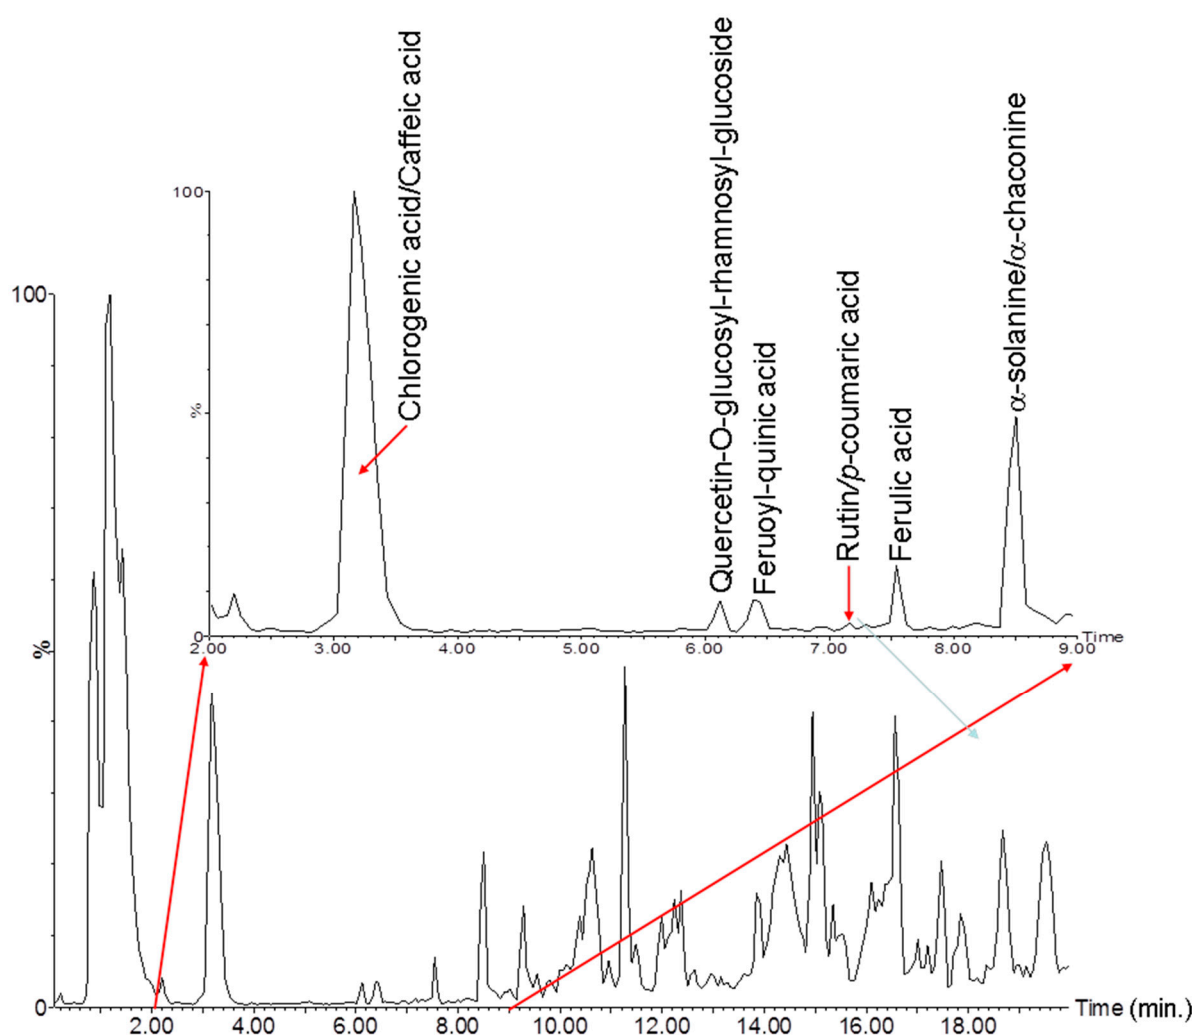

**Figure S1:** HPLC-Q-ToF-MS profiling of the phytochemicals in the potato (Saxon) extract. Shown in the inset is the LC chromatogram where the polyphenols and glycoalkaloids elute between 2-9 minutes.

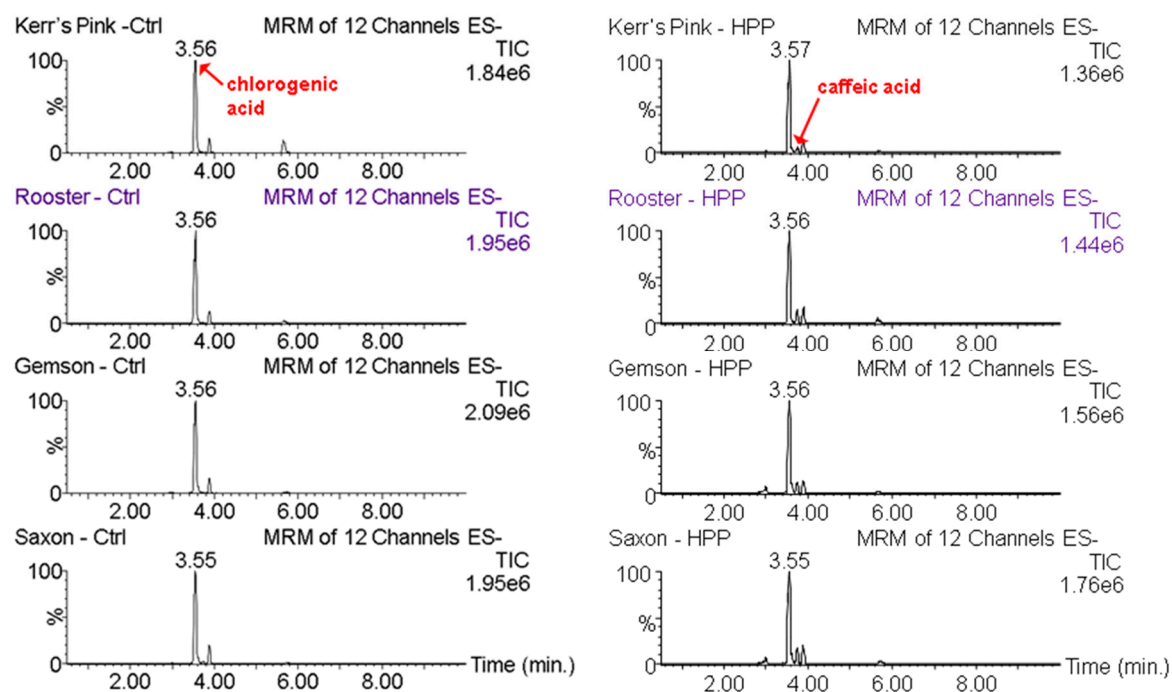

**Figure S2:** UPLC-TQD-MS quantification of polyphenols in the different potato cultivars prior to (left column) and post-HPP (right column). As evident from the total ion chromatograms (TIC) that chlorogenic acid is the most abundant polyphenol in potatoes, which is reduced in the post-HPP samples with an increase in caffeic acid.

**Table S1.** Tentative identification of phytochemicals from the potato (Saxon) extract using accurate mass measurement and MS/MS fragment ions

| RT (min.) | Observed [M-H] <sup>+</sup> (m/z) | Calculated [M-H] <sup>+</sup> (m/z) | Molecular formula                                             | MS/MS ions (m/z)       | Tentative Identification                 |
|-----------|-----------------------------------|-------------------------------------|---------------------------------------------------------------|------------------------|------------------------------------------|
| 0.88      | 158.9764                          | 158.9752                            | C <sub>5</sub> H <sub>4</sub> O <sub>4</sub> S                | 130.99, 115.00         | Dihydroxythiophene-carboxylic acid       |
| 0.98      | 191.0541                          | 191.0556                            | C <sub>7</sub> H <sub>12</sub> O <sub>6</sub>                 | 147.05                 | Quinic acid                              |
| 2.17      | 203.8050                          | 203.0821                            | C <sub>11</sub> H <sub>12</sub> N <sub>2</sub> O <sub>2</sub> | 159.09                 | Tryptophan                               |
| 3.17      | 353.0858                          | 353.0873                            | C <sub>16</sub> H <sub>18</sub> O <sub>9</sub>                | 191.08, 173.06, 135.06 | Chlorogenic acid                         |
| 3.46      | 179.0341                          | 179.0344                            | C <sub>9</sub> H <sub>8</sub> O <sub>4</sub>                  | 135.04                 | Caffeic acid                             |
| 6.12      | 771.1978                          | 771.1984                            | C <sub>33</sub> H <sub>40</sub> O <sub>21</sub>               | 300.03                 | Quercetin-O-glucosyl-rhamnosyl-glucoside |
| 6.39      | 367.1015                          | 367.1029                            | C <sub>17</sub> H <sub>20</sub> O <sub>9</sub>                | 193.04, 191.05, 173.05 | Feruloyl-quinic acid                     |
| 6.44      | 625.1384                          | 625.1405                            | C <sub>27</sub> H <sub>30</sub> O <sub>17</sub>               | 300.03, 191.05         | Quercetin- O-di-glucoside                |
| 7.16      | 609.1442                          | 609.1456                            | C <sub>27</sub> H <sub>30</sub> O <sub>16</sub>               | 301.03                 | Rutin                                    |
| 7.19      | 163.0387                          | 163.0395                            | C <sub>9</sub> H <sub>8</sub> O <sub>3</sub>                  | 119.05                 | <i>p</i> -coumaric acid                  |
| 7.51      | 193.0488                          | 193.0501                            | C <sub>10</sub> H <sub>10</sub> O <sub>4</sub>                | 134.04, 117.04         | Ferulic acid                             |
| 8.42      | 866.4885                          | 866.4902                            | C <sub>45</sub> H <sub>73</sub> NO <sub>15</sub>              | 704.51, 701.32, 558.47 | α-solanine                               |
| 8.48      | 850.4915                          | 850.4953                            | C <sub>45</sub> H <sub>73</sub> NO <sub>14</sub>              | 704.41, 422.14         | α-chaconine                              |

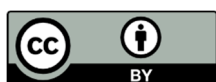

© 2019 by the authors. Submitted for possible open access publication under the terms and conditions of the Creative Commons Attribution (CC BY) license (<http://creativecommons.org/licenses/by/4.0/>).
